# Supplementary material
Source: ML conference proceedings conference paper supplement (https://openreview.net/forum?id=IHjKpKljyH)
Supplement: supplementary_material [file attachment]

|                    | T-Shirt/Top                                                                        | Trouser                                                                            | Pullover                                                                            | Dress                                                                                | Coat                                                                                 | Sandal                                                                               | Shirt                                                                                | Sneaker                                                                              | Bag                                                                                  | Ankle Boot                                                                           |
|--------------------|------------------------------------------------------------------------------------|------------------------------------------------------------------------------------|-------------------------------------------------------------------------------------|--------------------------------------------------------------------------------------|--------------------------------------------------------------------------------------|--------------------------------------------------------------------------------------|--------------------------------------------------------------------------------------|--------------------------------------------------------------------------------------|--------------------------------------------------------------------------------------|--------------------------------------------------------------------------------------|
| Parameter $\theta$ |    |    |    |    |    |    |    |    |    |    |
| Observation $x$    |   |   |   |   |   |   |   |   |   |   |
| Mean               |   |   |   |   |   |   |   |   |   |   |
| Std.Dev            |  |  |  |  |  |  |  |  |  |  |
