# Supplementary material
Source: ML conference proceedings conference paper supplement (https://openreview.net/forum?id=IHjKpKljyH)
Supplement: supplementary_material [file attachment]

|             | Param. $\theta$                                                                    | Obs. $x$                                                                            | Sample                                                                              | Sample                                                                              | Sample                                                                               | Sample                                                                                | Sample                                                                                |
|-------------|------------------------------------------------------------------------------------|-------------------------------------------------------------------------------------|-------------------------------------------------------------------------------------|-------------------------------------------------------------------------------------|--------------------------------------------------------------------------------------|---------------------------------------------------------------------------------------|---------------------------------------------------------------------------------------|
| T-Shirt/Top |     |     |     |     |     |     |     |
| Trouser     |    |    |    |    |    |    |    |
| Pullover    |    |    |    |    |    |    |    |
| Dress       |    |    |    |    |    |    |    |
| Coat        |   |   |   |   |   |   |   |
| Sandal      |  |  |  |  |  |  |  |
| Shirt       |  |  |  |  |  |  |  |
| Sneaker     |  |  |  |  |  |  |  |
| Bag         |  |  |  |  |  |  |  |
| Ankle Boot  |  |  |  |  |  |  |  |
